# Supplementary material for: Redo Surgical Mitral Valve Replacement Versus Transcatheter Mitral Valve in Valve From the National Inpatient Sample
Source: PubMed Central journal article supplement — J Am Heart Assoc. 2021 Aug 28;10(17):e020948. doi: 10.1161/JAHA.121.020948 (PMC8649266; doi:10.1161/jaha.121.020948), 2021-08-28

# **SUPPLEMENTAL MATERIAL**

## Data S1.

### 1.0 ICD 10 codes

Valve dysfunction: T82.01XA, T82.02XA, T82.03XA, T82.09XA, T82.221A, T82.222A, T82.223A, T82.228A, Z45.09, Z95.2, and T82.857

Redo-MVR: 02RG07Z, 02RG08Z, 02RG0KZ, and 02RG0JZ

MViV: 02RG37H,02RG37Z, 02RG38H, 02RG38Z,02RG3JH, 02RG3JZ, 02RG3KH, and 02RG3KZ

Mitral clip: 35.97, 02UG3JZ

CPR procedure code: 996.0 and 5A12012

Percutaneous coronary intervention: 3601-09, 0270, 0271,0272,0273

Pericardial effusion/Hemopericardium: 423.0 and I31.2

Cardiac Tamponade: 423.3 and I314

Pericardiocentesis: 370 And 0W9D3, 0W9D4

Cardiogenic Shock: 78551, R570, T8111XA

Need for blood products transfusion: 990x, 3023x

Pleural Effusion: 5111,51181,51189,5119, J90, J918

Pneumonia bacterial: 481-486; J13-J18

Tracheostomy: 519-, 312-,311-, 0B110--, 0B11-3-, 0B114--

PEG: 430,431-, 0DH60--, 0DH63--, 0DH67--, 0DH64--, 0DH68--, 0DHA0--, 0DHA3--, 0DHA4--, 0DHA8--, 0DH90--, 0DH93—

Vent: 9670-2, 5A1935Z, 5A1945Z, 5A1955Z

| Co morbidity             | ICD-10                                                                                  |
|--------------------------|-----------------------------------------------------------------------------------------|
| Congestive heart failure | I09.9, I11.0, I13.0, I13.2, I25.5, I42.0, I42.5–I42.9, I43.x, I50.x, P29.0              |
| Peripheral vascular      | I70.x, I71.x, I73.1, I73.8, I73.9, I77.1,I79.0, I79.2, K55.1, K55.8, K55.9,Z95.8, Z95.9 |

|                               |                                                                                                                                                                               |
|-------------------------------|-------------------------------------------------------------------------------------------------------------------------------------------------------------------------------|
| Cerebrovascular disease       | G45.x, G46.x, H34.0, I60.x–I69.x                                                                                                                                              |
| Chronic pulmonary disease     | I27.8, I27.9, J40.x–J47.x, J60.x–J67.x, J68.4, J70.1, J70.3                                                                                                                   |
| Diabetes without chronic      | E10.0, E10.1, E10.6, E10.8, E10.9, E11.0, E11.1, E11.6, E11.8, E11.9, E12.0, E12.1, E12.6, E12.8, E12.9, E13.0, E13.1, E13.6, E13.8, E13.9, E14.0, E14.1, E14.6, E14.8, E14.9 |
| Renal disease                 | I12.0, I13.1, N03.2–N03.7, N05.2–N05.7, N18.x, N19.x, N25.0, Z49.0–Z49.2, Z94.0, Z99.2                                                                                        |
| Peripheral vascular disorders | I70.x, I71.x, I73.1, I73.8, I73.9, I77.1, I79.0, I79.2, K55.1, K55.8, K55.9, Z95.8, Z95.9                                                                                     |
| Congestive heart failure      | I09.9, I11.0, I13.0, I13.2, I25.5, I42.0, I42.5–I42.9, I43.x, I50.x, P29.0                                                                                                    |
| Hypertension, uncomplicated   | I10.x                                                                                                                                                                         |
| Hypertension, complicated     | I11.x–I13.x, I15.x                                                                                                                                                            |
| Chronic pulmonary disease     | I27.8, I27.9, J40.x–J47.x, J60.x–J67.x, J68.4, J70.1, J70.3                                                                                                                   |
| Diabetes, uncomplicated       | E10.0, E10.1, E10.9, E11.0, E11.1, E11.9, E12.0, E12.1, E12.9, E13.0, E13.1, E13.9, E14.0, E14.1, E14.9                                                                       |
| Diabetes, complicated         | E10.2–E10.8, E11.2–E11.8, E12.2–E12.8, E13.2–E13.8, E14.2–E14.8                                                                                                               |
| Renal failure                 | I12.0, I13.1, N18.x, N19.x, N25.0, Z49.0–Z49.2, Z94.0, Z99.2                                                                                                                  |
| Liver disease                 | B18.x, I85.x, I86.4, I98.2, K70.x, K71.1, K71.3–K71.5, K71.7, K72.x–K74.x, K76.0, K76.2–K76.9, Z94.4                                                                          |
| coagulopathy                  | D65–D68.x, D69.1, D69.3–                                                                                                                                                      |

|                   |                           |
|-------------------|---------------------------|
|                   | D69.6                     |
| obesity           | E66.x                     |
| Deficiency anemia | D50.8, D50.9, D51.x–D53.x |

**Table S1. ICD-10 codes used**

## 2.0 Variables used in Propensity match analysis

1. Age
2. Gender
3. Race
4. Anemia
5. Cerebrovascular disease
6. Congestive heart failure
7. Chronic pulmonary disease
8. Coagulopathy
9. Hypertension
10. Diabetes
11. obesity
12. Hypertension
13. Smoking
14. Peripheral vascular disorders
15. Weight loss
16. Urban/rural setting  
Rural, urban, urban teaching
17. Hospital bedsize  
Small, medium, large
18. Payer  
Medicare, Medicaid, private, others

## 3.0 Data Representation after propensity matching

Figure S1. Propensity scores of match and un matched cohorts.

### Distribution of Propensity Scores

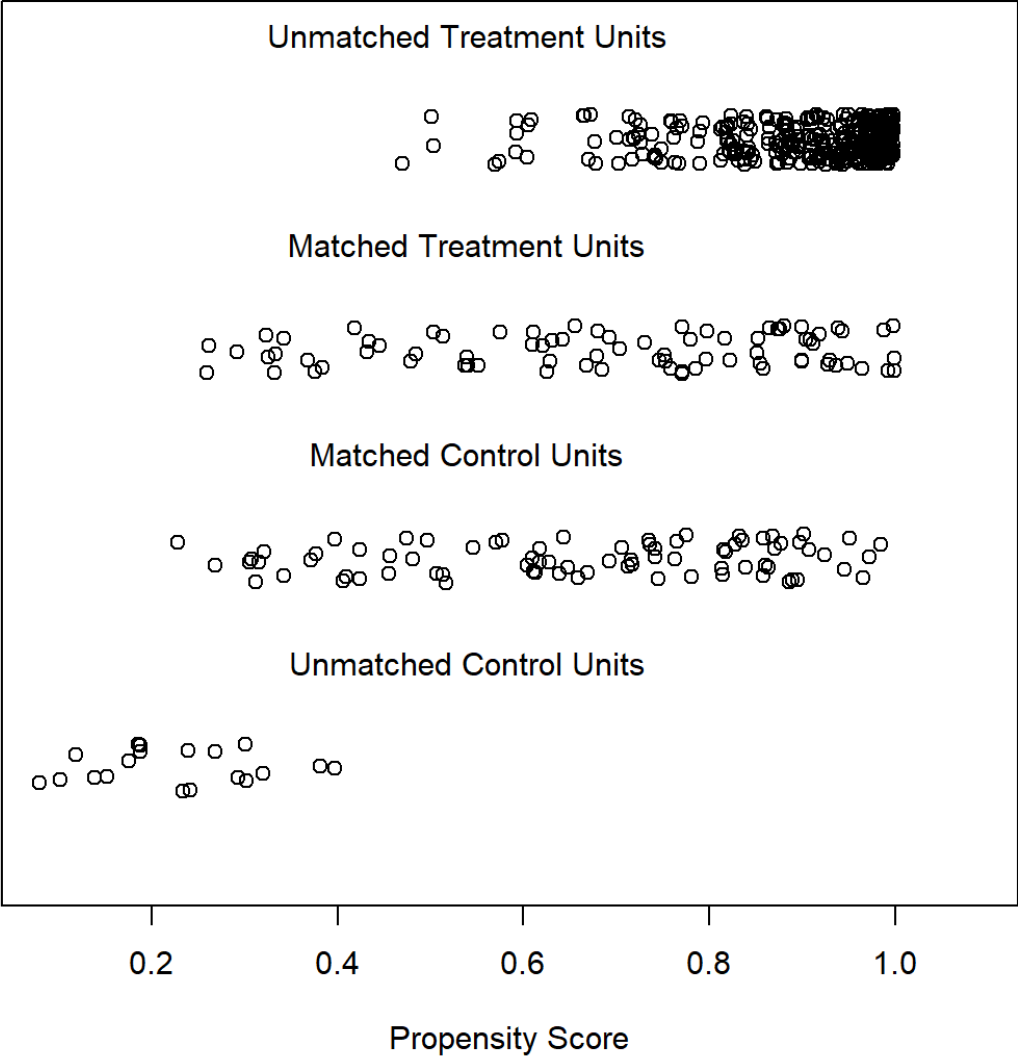

Figure S2. Absolute Standardized difference in means of matched and unmatched cohort.

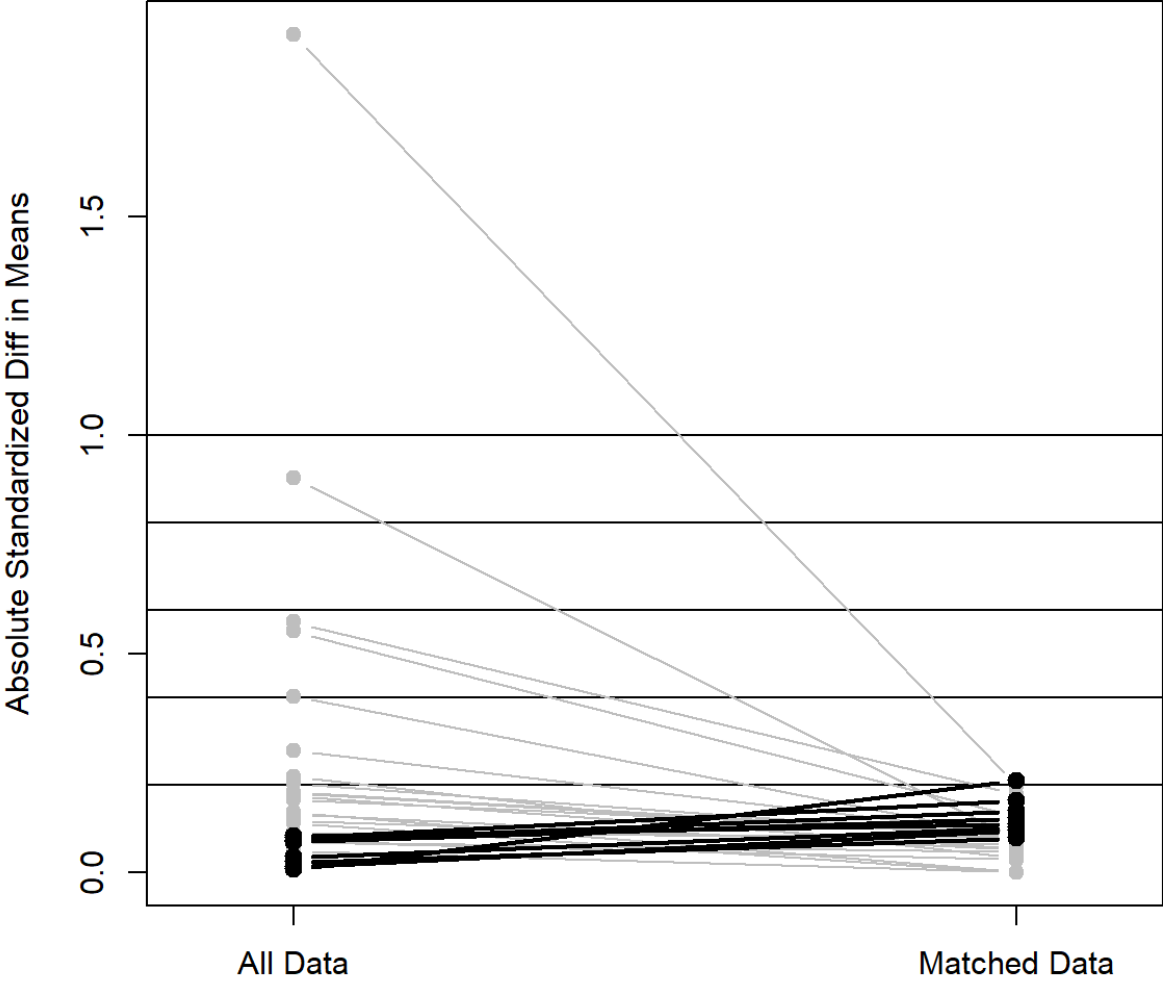

**Figure S3. Propensity score histograms of matched and unmatched data.**

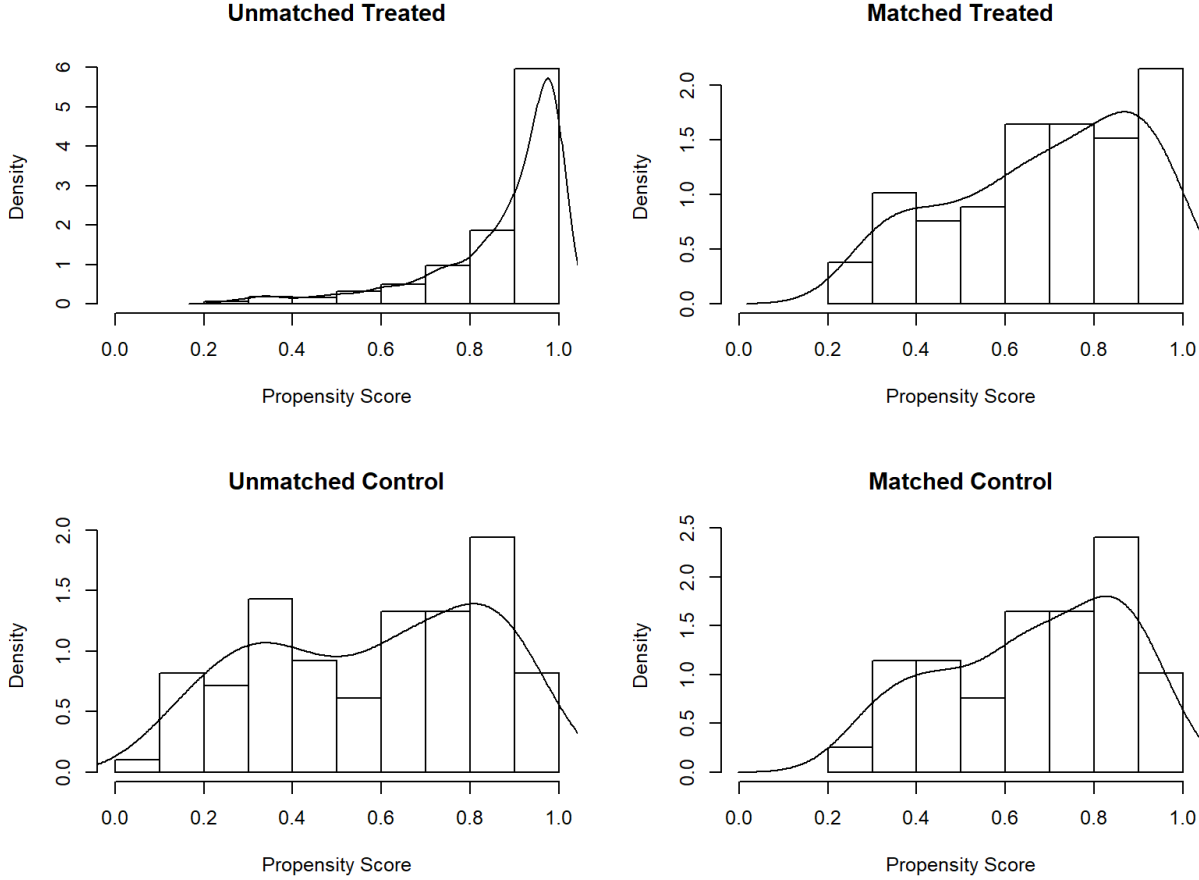

Figure S4. Standardized mean difference before and after matching.

### Standardized differences before matching

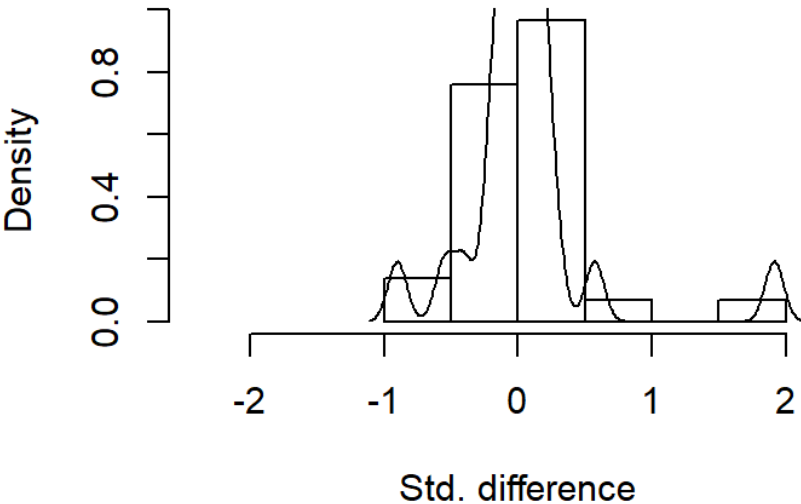

### Standardized differences after matching

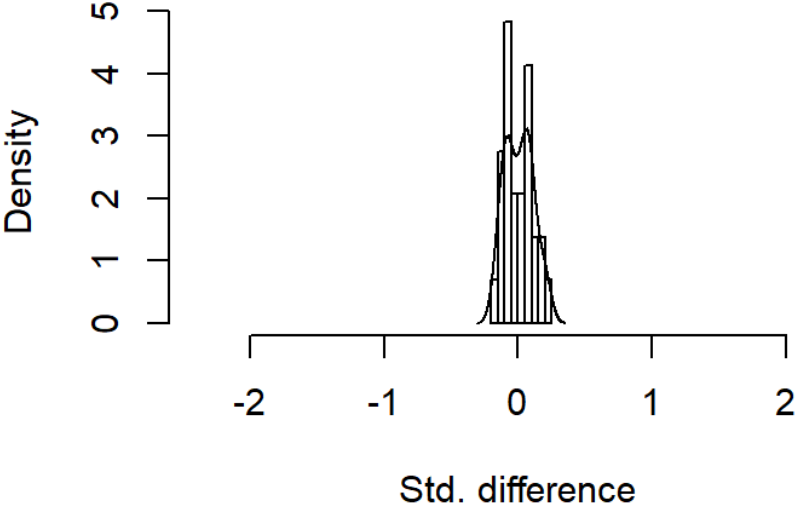

Supplement: JAH3-10-e020948-s001.pdf [file JAH3-10-e020948-s001.pdf]
